# Supplementary figures and images for: DREAMM-2: Indirect Comparisons of Belantamab Mafodotin vs. Selinexor + Dexamethasone and Standard of Care Treatments in Relapsed/Refractory Multiple Myeloma
Source: PubMed Central journal article supplement — Adv Ther. 2021 Sep 24;38(11):5501–18. doi: 10.1007/s12325-021-01884-7 (PMC8523001; doi:10.1007/s12325-021-01884-7), 2021-09-24

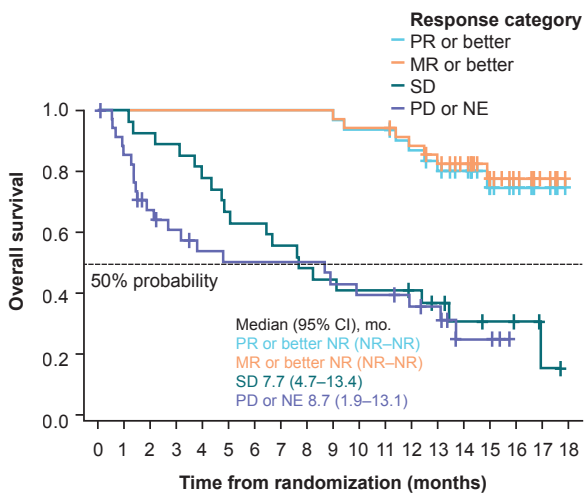

**Number at risk (Number of events)**

|              |     |     |      |      |      |      |      |      |      |      |      |      |      |      |      |      |      |      |      |
|--------------|-----|-----|------|------|------|------|------|------|------|------|------|------|------|------|------|------|------|------|------|
| PR or better | 31  | 31  | 31   | 31   | 31   | 31   | 31   | 31   | 31   | 31   | 29   | 29   | 26   | 23   | 20   | 13   | 9    | 5    | 0    |
|              | (0) | (0) | (0)  | (0)  | (0)  | (0)  | (0)  | (0)  | (0)  | (0)  | (2)  | (2)  | (4)  | (6)  | (6)  | (7)  | (7)  | (7)  | (7)  |
| MR or better | 35  | 35  | 35   | 35   | 35   | 35   | 35   | 35   | 35   | 35   | 33   | 33   | 30   | 27   | 23   | 15   | 10   | 5    | 0    |
|              | (0) | (0) | (0)  | (0)  | (0)  | (0)  | (0)  | (0)  | (0)  | (0)  | (2)  | (2)  | (4)  | (6)  | (6)  | (7)  | (7)  | (7)  | (7)  |
| SD           | 27  | 27  | 25   | 24   | 21   | 18   | 17   | 15   | 13   | 12   | 11   | 11   | 10   | 8    | 5    | 4    | 3    | 1    | 0    |
|              | (0) | (0) | (2)  | (3)  | (6)  | (9)  | (10) | (12) | (14) | (15) | (16) | (16) | (16) | (17) | (18) | (18) | (18) | (19) | (19) |
| PD or NE     | 35  | 29  | 21   | 18   | 15   | 14   | 14   | 14   | 14   | 12   | 11   | 11   | 9    | 8    | 3    | 3    | 0    |      |      |
|              | (0) | (5) | (11) | (13) | (15) | (16) | (16) | (16) | (16) | (18) | (19) | (19) | (20) | (20) | (22) | (22) | (22) |      |      |

Supplement: 12325_2021_1884_MOESM3_ESM.pdf [file 12325_2021_1884_MOESM3_ESM.pdf]
